# Supplementary material for: Effects of Anticoagulants on Experimental Models of Established Chronic Liver Diseases: A Systematic Review and Meta-Analysis
Source: Can J Gastroenterol Hepatol. 2020 Dec 11;2020:8887574. doi: 10.1155/2020/8887574 (PMC7749775; doi:10.1155/2020/8887574)
Supplement: Supplementary Materials — Table S1: completed PRISMA checklist reporting. Table S2: detailed characteristics of selected publications. Table S3: risk of bias assessment for all studies. [file 8887574.f1.zip]

Archive with 3 entries (3 files):
- 8887574.f1/Table S1 (2).docx
- 8887574.f1/Table S2 (2).docx
- 8887574.f1/Table S3 (2).docx
